# Supplementary material for: Prevalence of Mental Health Diagnoses in Commercially Insured Children and Adolescents in the US Before and During the COVID-19 Pandemic
Source: PubMed Central journal article supplement (PMC10203892; doi:10.1001/jamanetworkopen.2023.14415), 2023-05-22
Supplement: jamanetwopen-e2314415-s002.pdf [file jamanetwopen-e2314415-s002.pdf]

## **Data Sharing Statement**

Straub. Prevalence of Mental Health Diagnoses in Commercially Insured Children and Adolescents in the US Before and During the COVID-19 Pandemic. *JAMA Netw Open*. Published May 22, 2023. doi:10.1001/jamanetworkopen.2023.14415

### **Data**

**Data available:** No
